# Supplementary material for: Distinct Roles of Non-Canonical Poly(A) Polymerases in RNA Metabolism
Source: PLoS Genet. 2009 Jul 10;5(7):e1000555. doi: 10.1371/journal.pgen.1000555 (PMC2700272; doi:10.1371/journal.pgen.1000555)
Supplement: Table S3 — Significantly enriched GO terms among transcripts that are significantly increased in the trf4Δ and the trf5Δ mutants. Columns indicate the following (from left to right): Mutant strain; category; gene ontology (GO) term; number of genes with annotations; number of genes in the genome with annotation; p-value. (0.02 MB XLS) [file pgen.1000555.s009.xls]

## Sheet: GO terms
Mutant	Category	GO term	# Annotations	# Genome Annotations (total 7159)	p-value
trf4∆	Process	transposition	67 (21.4%)	137 (1.9%)	1.6e-53
(313 GO genes)		rRNA modification	22 (7.0%)	84 (1.2%)	1.62e-09
		rRNA pseudouridine synthesis	11 (3.5%)	32 (0.4%)	1.86e-05
		rRNA methylation	11 (3.5%)	45 (0.6%)	0.00088
		rRNA processing	28 (8.9%)	276 (3.9%)	0.0084
		glycolysis	7 (2.2%)	22 (0.3%)	0.00981
	Function	RNA-directed DNA polymerase activity	35 (11.2%)	50 (0.7%)	5.47e-35
		DNA-directed DNA polymerase activity	35 (11.2%)	64 (0.9%)	1.96e-29
		RNA binding	101 (32.3%)	677 (9.5%)	4.96e-29
		DNA polymerase activity	35 (11.2%)	67 (0.9%)	1.69e-28
		ribonuclease activity	35 (11.2%)	94 (1.3%)	3.36e-22
		nucleotidyltransferase activity	36 (11.5%)	120 (1.7%)	3.57e-19
		nucleic acid binding	107 (34.2%)	1021 (14.3%)	6.64e-18
		nuclease activity	35 (11.2%)	137 (1.9%)	4.2e-16
		peptidase activity	37 (11.8%)	156 (2.2%)	6.46e-16
		protein binding	74 (23.6%)	613 (8.6%)	1.07e-14
		rRNA binding	25 (8.0%)	87 (1.2%)	1.69e-12
		RNA modification guide activity	22 (7.0%)	71 (1.0%)	1.21e-11
		rRNA modification guide activity	22 (7.0%)	71 (1.0%)	1.21e-11
		hydrolase activity(acting on ester bonds	37 (11.8%)	275 (3.8%)	6.59e-08
		rRNA pseudouridylation guide activity	11 (3.5%)	28 (0.4%)	1.21e-06
		transferase activity(transferring phosphorus-containing groups	39 (12.5%)	343 (4.8%)	2.91e-06
		RNA 2'-O-ribose methylation guide activity	11 (3.5%)	43 (0.6%)	0.00018
	Compartment	retrotransposon nucleocapsid	65 (20.8%)	94 (1.3%)	2.21e-66
		nuclear part	116 (37.1%)	1154 (16.1%)	2.34e-18
		small nucleolar ribonucleoprotein complex	27 (8.6%)	105 (1.5%)	2.73e-12
		nucleolar part	29 (9.3%)	144 (2.0%)	2.5e-10
		box H/ACA snoRNP complex	12 (3.8%)	31 (0.4%)	2.85e-07
		box C/D snoRNP complex	15 (4.8%)	52 (0.7%)	3.23e-07
		nucleus	130 (41.5%)	2025 (28.3%)	1.68e-05
		ribonucleoprotein complex	56 (17.9%)	698 (9.7%)	0.00041
		nucleolus	31 (9.9%)	305 (4.3%)	0.00089
trf5∆	Process	carboxylic acid metabolic process	30 (13.6%)	336 (4.7%)	4.78e-05
(220 GO genes)		organic acid metabolic process	30 (13.6%)	336 (4.7%)	4.78e-05
		alcohol biosynthetic process	11 (5.0%)	57 (0.8%)	0.00044
		cellular amine metabolic process	21 (9.5%)	224 (3.1%)	0.00211
		cellular nitrogen compound metabolic process	21 (9.5%)	227 (3.2%)	0.0026
		sulfate assimilation	5 (2.3%)	10 (0.1%)	0.00271
		response to drug	15 (6.8%)	126 (1.8%)	0.00297
		sulfur metabolic process	11 (5.0%)	72 (1.0%)	0.00485
		pyruvate metabolic process	8 (3.6%)	39 (0.5%)	0.0088
		gluconeogenesis	7 (3.2%)	29 (0.4%)	0.00959
		nitrogen compound metabolic process	21 (9.5%)	247 (3.5%)	0.00961
	Function	structural constituent of ribosome	19 (8.6%)	228 (3.2%)	0.00881
	Compartment	cell part	197 (89.5%)	5502 (76.9%)	0.00011
		cell	197 (89.5%)	5503 (76.9%)	0.00011
		cytosolic part	22 (10.0%)	222 (3.1%)	0.00015
		cytosolic ribosome	19 (8.6%)	175 (2.4%)	0.00022
		fungal-type cell wall	12 (5.5%)	90 (1.3%)	0.00257
		cytosolic large ribosomal subunit	12 (5.5%)	97 (1.4%)	0.00553
		external encapsulating structure	12 (5.5%)	100 (1.4%)	0.00751
		cell wall	12 (5.5%)	100 (1.4%)	0.00751
